# Supplementary material for: Colloidal quantum dot chains: self-assembly mechanism and ratiometric fluorescent sensing
Source: Royal Society of Chemistry journal article supplement (doi:10.1039/c7ra10259c), 2017-01-01
Supplement: c7ra10259c1.pdf [file c7ra10259c1.pdf]

## Supporting Information

### Colloidal Quantum Dot Chains: Self-Assembled Mechanism and Ratiometric

Qin Sun,<sup>a,b,c</sup> Liang Yang,<sup>a,b,c</sup> Lei Su,<sup>a,b,c</sup> Weikang Liu,<sup>a</sup> Yifan Wang,<sup>a</sup> Shaoming Yu, Changlong Jiang,<sup>\*,a,b,c</sup> and Zhongping Zhang<sup>a,c,d</sup>

<sup>a</sup>CAS Center for Excellence in Nanoscience, Institute of Intelligent Machines, Chinese Academy of Sciences, Hefei, Anhui 230031, China

<sup>b</sup>Department of Chemistry, University of Science and Technology of China, Hefei, Anhui 230026, China.

<sup>c</sup>State Key Laboratory of Transducer Technology, Chinese Academy of Sciences, Hefei, Anhui 230031, China.

<sup>d</sup>School of Chemistry and Chemical Engineering, Anhui University, Hefei, Anhui 230601, China

\*To whom correspondence should be addressed. E-mail: cljiang@iim.ac.cn. Fax: (+86) 551-65591156.

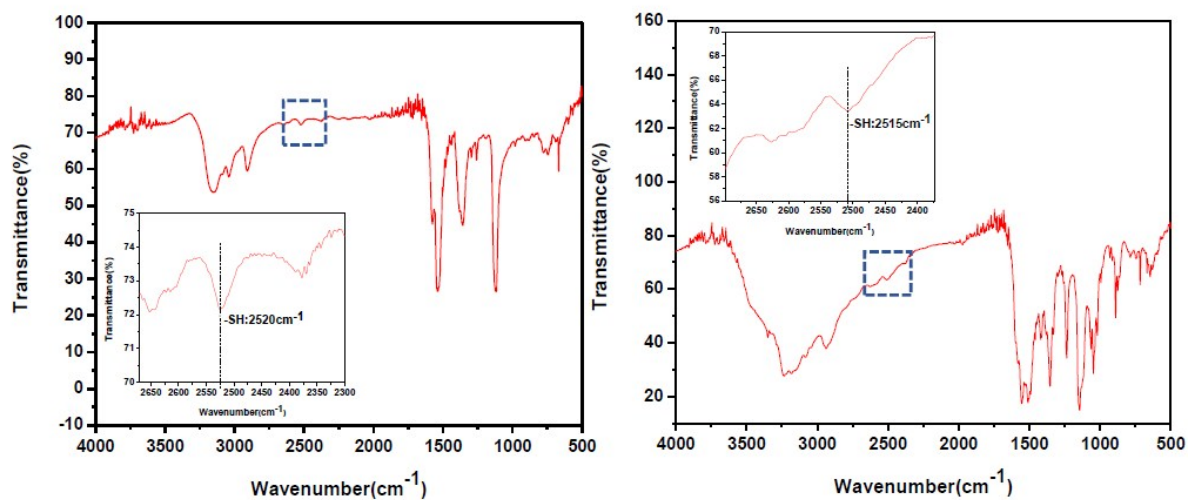

**Figure S1.** FTIR spectra of TTCA (left) and TTCA-QDs (right)

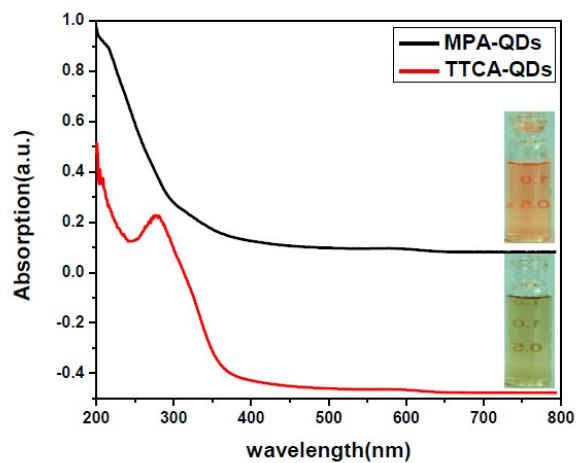

**Figure S2.** The normalized absorption spectra of MPA-QDs and TTCA-QDs. Inserts are the corresponding digital photos.

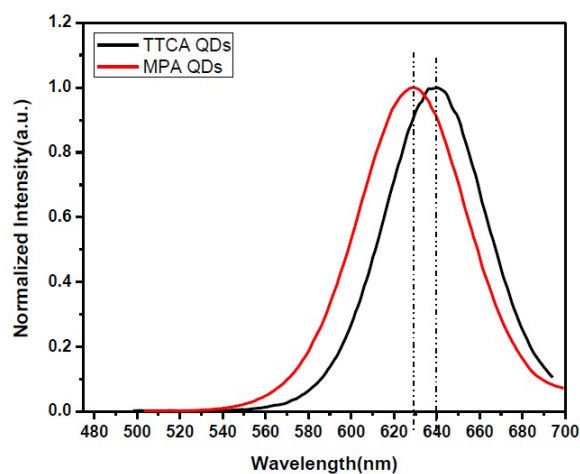

**Figure S3.** The normalized fluorescent intensity of TTCA-QDs and MPA QDs respectively.

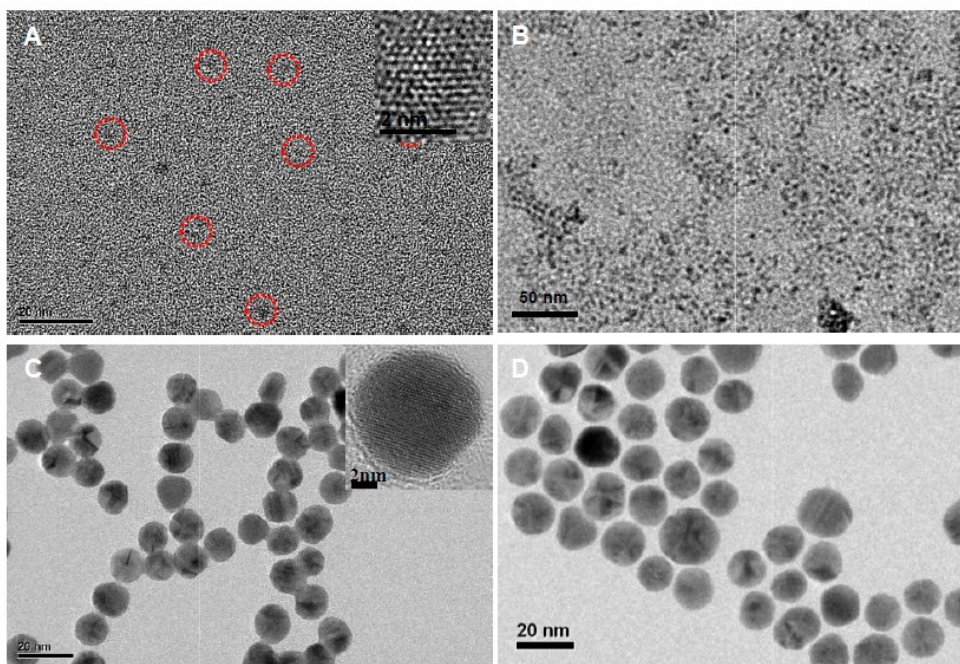

**Figure S4.** TEM images of the nanocrystals with different sizes. The green-emission QDs with the size of about 2 nm without (A) and with the treatment of TTCA(B), Au nanoparticles with the size of about 12 nm without (C) and with the treatment of TTCA(D). Insert HRTEM images in A and C indicate the nice crystalline essence of the QDs and Au NPs

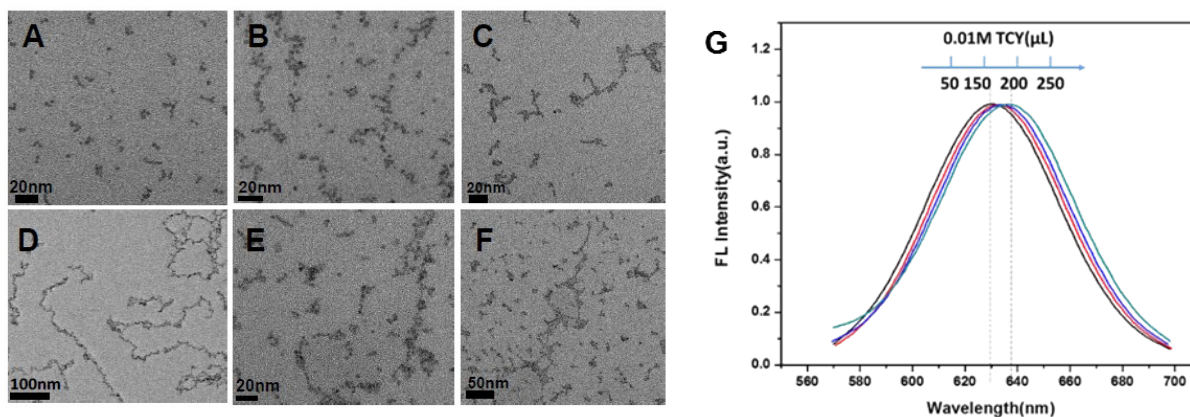

**Figure S5.** TEM image of TTCA-QDs for different amounts of TTCA used in the experiments. (A) 50  $\mu\text{L}$  0.01 M; (B) 150  $\mu\text{L}$  0.01 M; (C) 200  $\mu\text{L}$  0.01 M; (D) 250  $\mu\text{L}$  0.01 M; (E) 300  $\mu\text{L}$  0.01 M; (F) 400  $\mu\text{L}$  0.01 M. (G) The Fluorescent spectra of different QDs assemblies.

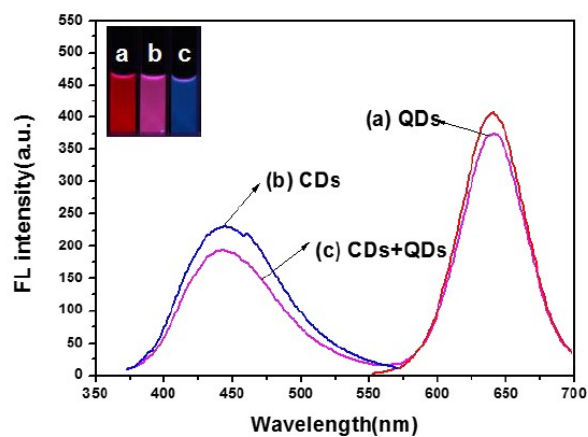

**Figure S6.** Fluorescent spectra of CDs and TTCA-modified CdTe QDs and the mixing TTCA-QDs/CDs at the excitation of 350 nm (the inset photos were taken under 365nm UV lamp).

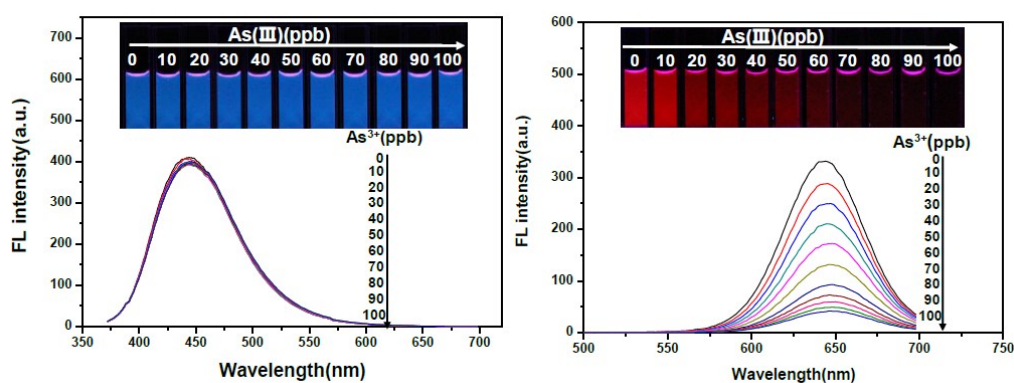

**Figure S7.** Fluorescent spectra of CDs (left) and TTCA-QDs (right) with the addition of As(III). The insets show the corresponding fluorescent photos under 365 nm UV lam

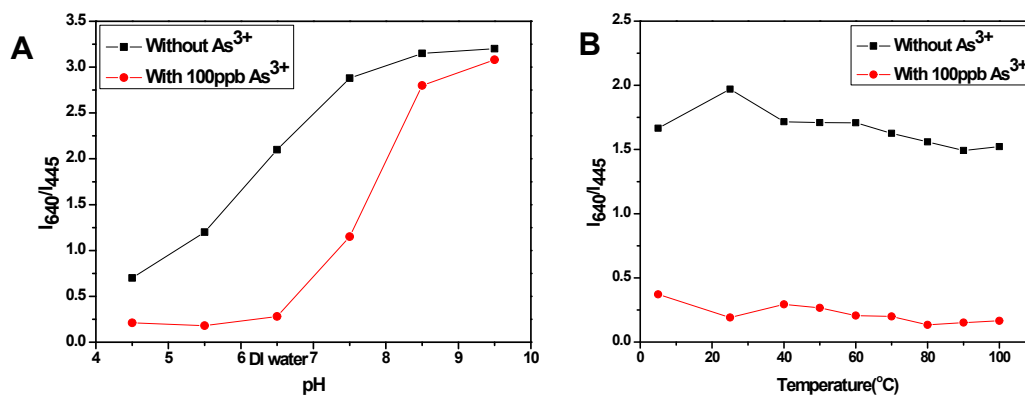

**Figure S8.** Effect of temperature and pH on the fluorescence intensity ratio ( $I_{640}/I_{445}$ ) of the ratiometric probe in the absence (black line) and presence (red line) of 100 ppb As<sup>3+</sup>.

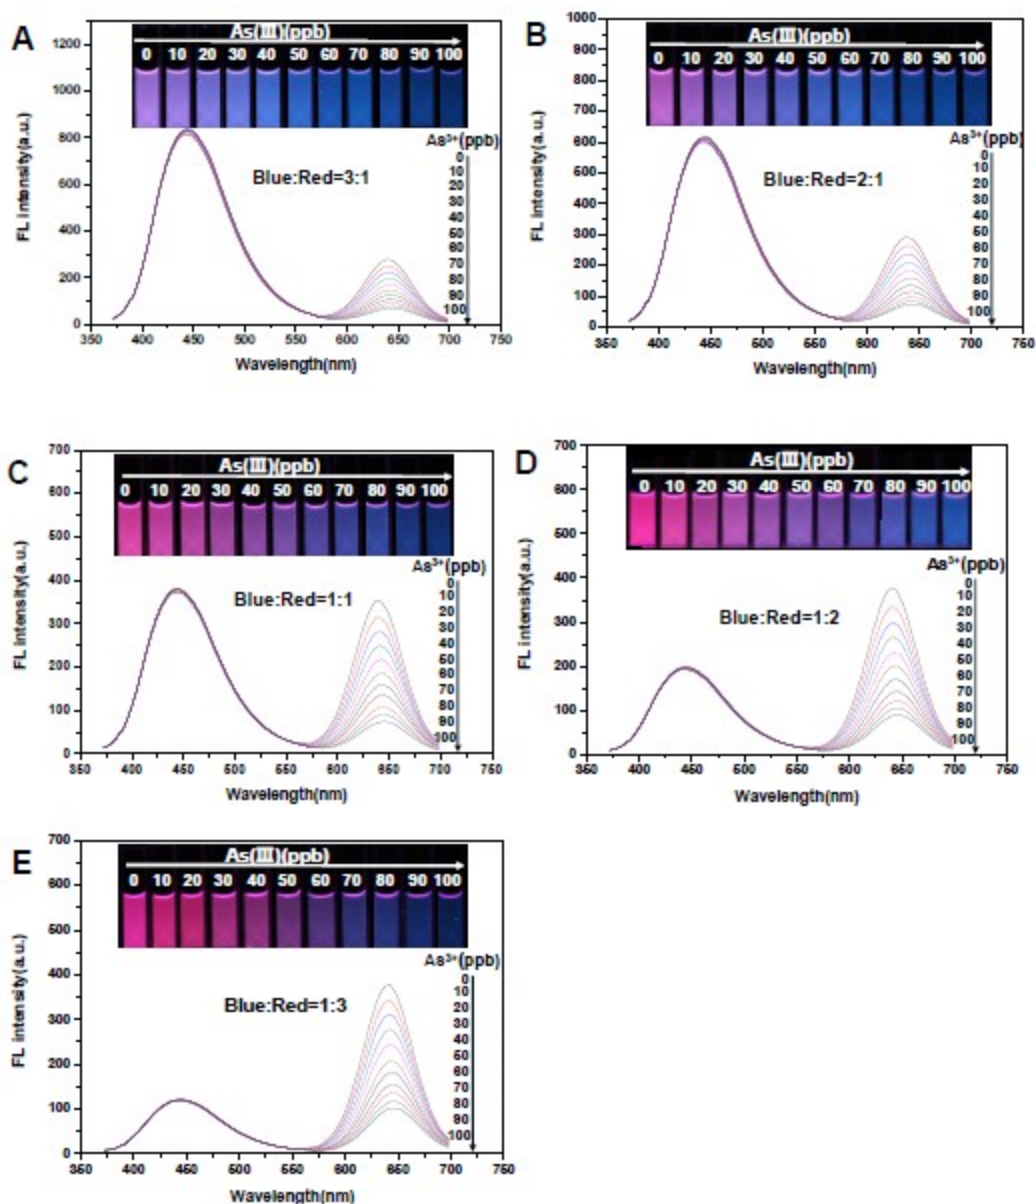

**Figure S9.** The fluorescent spectra of mixture of blue CDs and red TTCA-QD chains at different ratios with the addition of As(III). The ratios of fluorescent intensity (blue to red) were (A) 3:1, (B) 2:1, (C) 1:1, (D) 1:2, (E) 1:3. The insets show the corresponding fluorescent photos under 365 nm UV lamp.



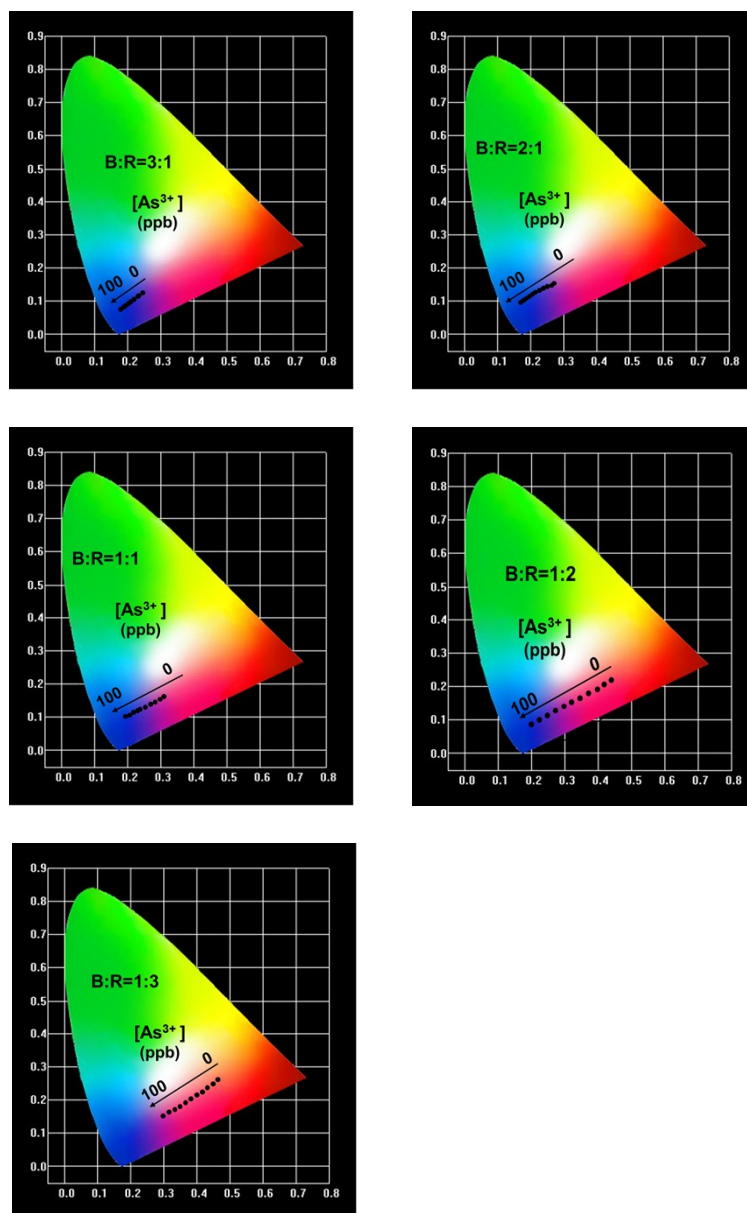

**Figure S10** The chromaticity data of the optimum choice for CDs and TTCA-QD chains ratio at 3:1, 2:1, 1:1, 1:2, 1:3 respectively.

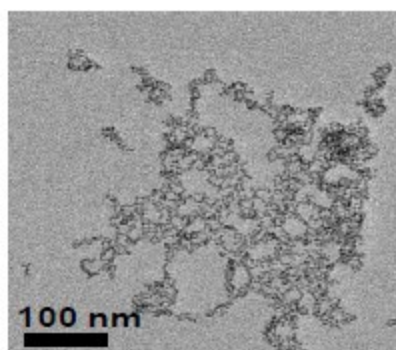

**Figure S11.** The TEM image of the TTCA-QDS samples after adding As<sup>3+</sup>

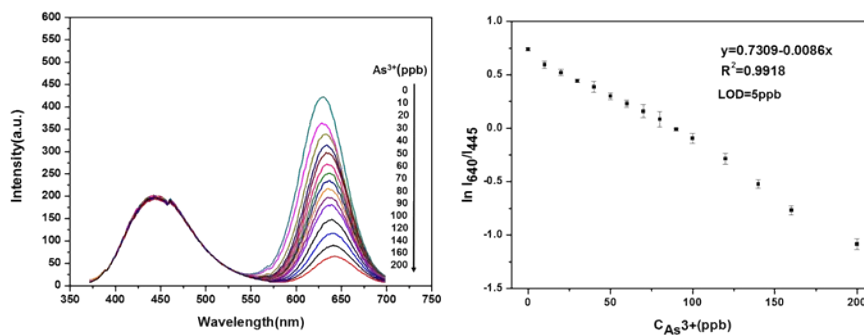

**Figure S12.** (A) The fluorescent spectra of mixture of blue CDs and red MPA QDs at ratios 1:2 with the addition of As(III). (B) Fluorescent intensity ratio,  $\ln(I_{640}/I_{445})$ , vs the concentrations of As(III) in the MPA-QDs/CDs. The LOD was 5ppb.

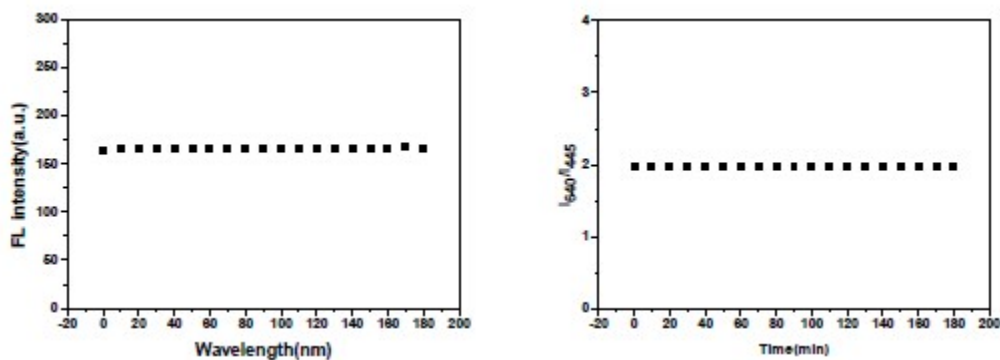

**Figure S13.** Photostabilities of (A) blue CDs and (B) the ratio of mixing TTCA-QDs/CDs fluorescence (at 640 and 445 nm).

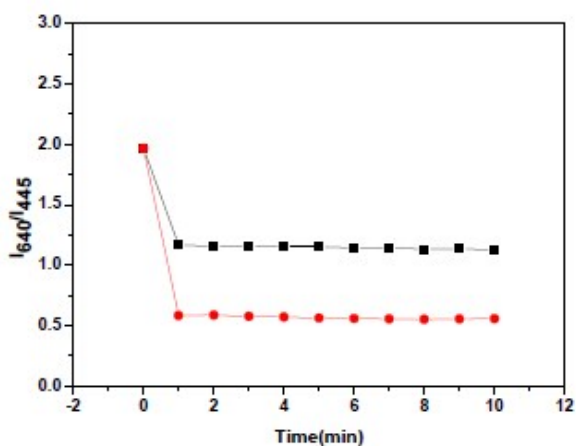

**Figure S14.** The dynamics of fluorescent responses of TTCA-QDs/CDs to 50 and 100 ppb As(III).

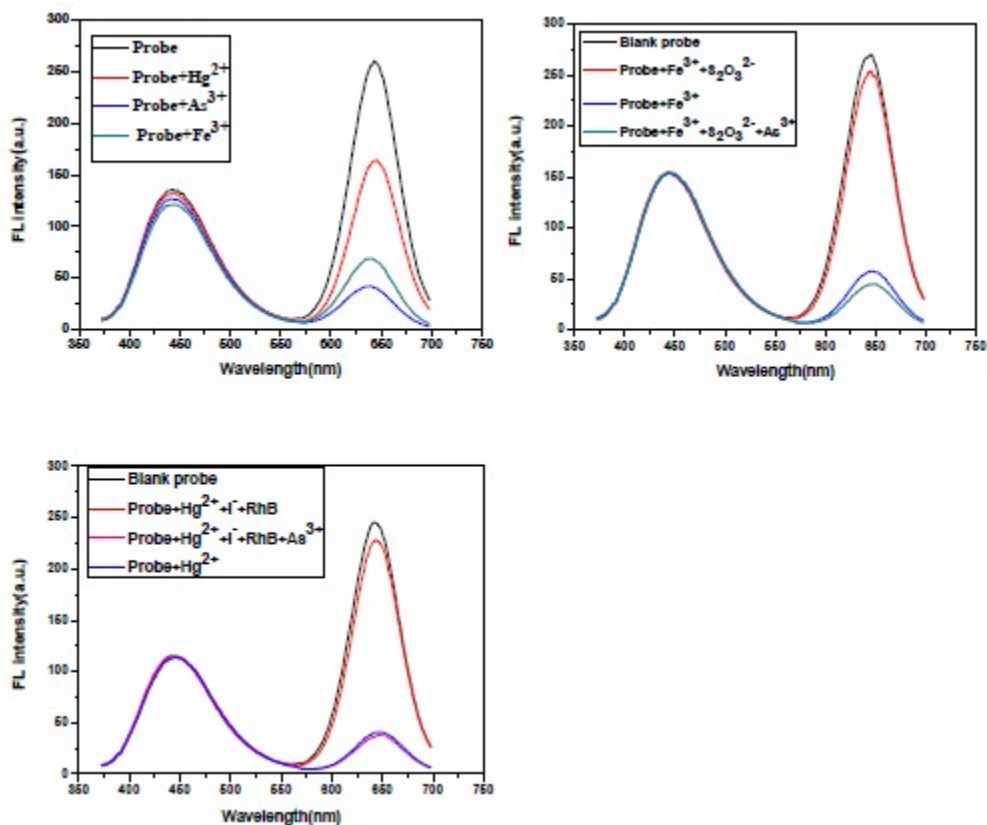

**Figure S15.** (a) Fluorescent responses of TTCA-QDs/CDs to  $\text{Hg}^{2+}$ ,  $\text{Fe}^{3+}$  and  $\text{As}^{3+}$  ( $\text{Hg}^{2+}$  and  $\text{Fe}^{3+}$ :13.4 $\mu\text{M}$ ,  $\text{As}^{3+}$ :1.34 $\mu\text{M}$ ). (b)  $\text{Fe}^{3+}$ ,  $\text{Fe}^{3+}+\text{S}_2\text{O}_3^{2-}$ ,  $\text{Fe}^{3+}+\text{S}_2\text{O}_3^{2-}+\text{As}^{3+}$  ( $\text{Fe}^{3+}$ :13.4 $\mu\text{M}$ ,  $\text{S}_2\text{O}_3^{2-}$ :134 $\mu\text{M}$ ,  $\text{As}^{3+}$ :1.34 $\mu\text{M}$ ). (c) Fluorescent responses to  $\text{Hg}^{2+}$ ,  $\text{Hg}^{2+}+\text{I}^-+\text{RhB}$ ,  $\text{Hg}^{2+}+\text{I}^-+\text{RhB}+\text{As}^{3+}$ . The addition of  $\text{S}_2\text{O}_3^{2-}$  and  $\text{I}^-$ , RhB can effectively eliminate the interferences of  $\text{Fe}^{3+}$  and  $\text{Hg}^{2+}$  respectively.



Table S1. The comparisons of As(III) nanosensors in the previous and present works

| Methods          | Detection mechanism               | Detection limit(ppb) | Refs     |
|------------------|-----------------------------------|----------------------|----------|
| Au-Cu bimetallic | Electrochemical detection         | 2.09                 | 1        |
| Ag nanoparticles | Surface-enhanced Raman            | 0.76                 | 2        |
| Graphene oxide   | Electrochemical detection         | 500                  | 3        |
| Aptamer sensor   | Colorimetric/resonance scattering | 40                   | 4        |
| Instrument       | Inductively coupled plasma-mass   | 6.2                  | 5        |
| Instrument       | Atomic absorption spectrometry    | 0.008                | 6        |
| Our work         | Fluorescent test paper            | 1                    | Our work |

Table S2. The recoveries of As(III) in tap water and local lake water using the fluorescent measurements of TTCA-QDs/CDs probes.

| Spiked concentration<br>(ppb) | Tap water   |              |         | Lake water  |              |         |
|-------------------------------|-------------|--------------|---------|-------------|--------------|---------|
|                               | Found (ppb) | Recovery (%) | RSD (%) | Found (ppb) | Recovery (%) | RSD (%) |
| 10                            | 10.3        | 103          | 4.7     | 9.9         | 99           | 2.9     |
| 50                            | 49.7        | 99.4         | 3.4     | 48.6        | 97.2         | 5.8     |
| 100                           | 102.5       | 102.5        | 5.5     | 103.4       | 103.4        | 4.6     |

## References

1. M. Yang, Z. Guo, L.-N. Li, Y.-Y. Huang, J.-H. Liu, Q. Zhou, X. Chen and X.-J. Huang, *Sensor. Actuat. B-Chem.*, 2016, 231, 70-78.
2. J. Li, L. Chen, T. Lou and Y. Wang, *ACS Appl. Mater. Inter.*, 2011, 3, 3936-3941.
3. S. Kumar, G. Bhanjanaa, N. Dilbaghi, R. Kumar and A. Umar, *Sensor. Actuat. B-Chem.*, 2016, 227, 29-34.
4. Y. Wu, L. Liu, S. Zhan, F. Wang and P. Zhou, *Analyst*, 2012, 137, 4171-4178.
5. E. Becker, R. T. Rampazzo, M. B. Dessuy, M. G. R. Vale, M. M. da Silva, B. Welz and D. A. Katskov, *Spectrochim. Acta B*, 2011, 66, 345-351.
6. C.Y. Tai, S.J. Jiang and A. C. Sahayam, *Food Chem.*, 2016, 192, 274-279.
